# Supplementary material
Source: PubMed Central journal article supplement (PMC7963577)
Supplement: 17-00357.pdf [file 17-00357.pdf]

**Online Table 1: Semiquantitative histologic score used to facilitate correlation between histologic tumor architecture and ADC histograms**

| Semiquantitative Histologic Score <sup>a</sup> | Histopathologic Features                                                                                                                 |
|------------------------------------------------|------------------------------------------------------------------------------------------------------------------------------------------|
| Score 1 (most heterogeneous microarchitecture) | Well differentiated, keratinizing, very abundant stromal component, highly variable areas of necrosis                                    |
| Score 2                                        | Well to moderately differentiated, keratinizing, abundant stromal component, variable areas of necrosis                                  |
| Score 3                                        | Moderately differentiated, keratinizing, moderate stromal component, areas of necrosis                                                   |
| Score 4                                        | Moderately to poorly differentiated, focal keratinization, scant stromal component, small areas of necrosis and scattered comedonecrosis |
| Score 5 (most homogeneous microarchitecture)   | Poorly differentiated, nonkeratinizing, very scant stromal component, scattered comedonecrosis                                           |

<sup>a</sup> Score 1 corresponded to the most heterogeneous HNSCCs, whereas score 5 corresponded to the most homogeneous tumors.

**Online Table 2: Correlation between HPV status, ADCmean, and prognostic factors**

|                                   | Odds Ratio | 95% CI           | P Value |
|-----------------------------------|------------|------------------|---------|
| ADCmean <sup>a</sup>              | 1.5370     | (1.0754–2.3106)  | .0254   |
| Age                               | 0.9745     | (0.9010–1.0515)  | .5056   |
| Sex <sup>b</sup>                  | 1.5968     | (0.4233–5.9116)  | .4798   |
| Localization <sup>c</sup>         | 3.9290     | (0.9771–19.9770) | .0671   |
| T                                 | 1.0796     | (0.5452–2.1746)  | .8253   |
| N                                 | 1.1587     | (0.5473–2.5240)  | .7007   |
| Degree of keratinization          | 1.5917     | (0.7093–3.7201)  | .2626   |
| Semiquantitative histologic score | 1.6313     | (0.8458–3.4372)  | .1617   |

<sup>a</sup> ADCmean categorized by steps of  $100 \text{ U} \times 10^{-6} \text{ mm}^2/\text{s}$ .

<sup>b</sup> Categorized as male (baseline) or female.

<sup>c</sup> Categorized as oral cavity (baseline) or oropharynx.

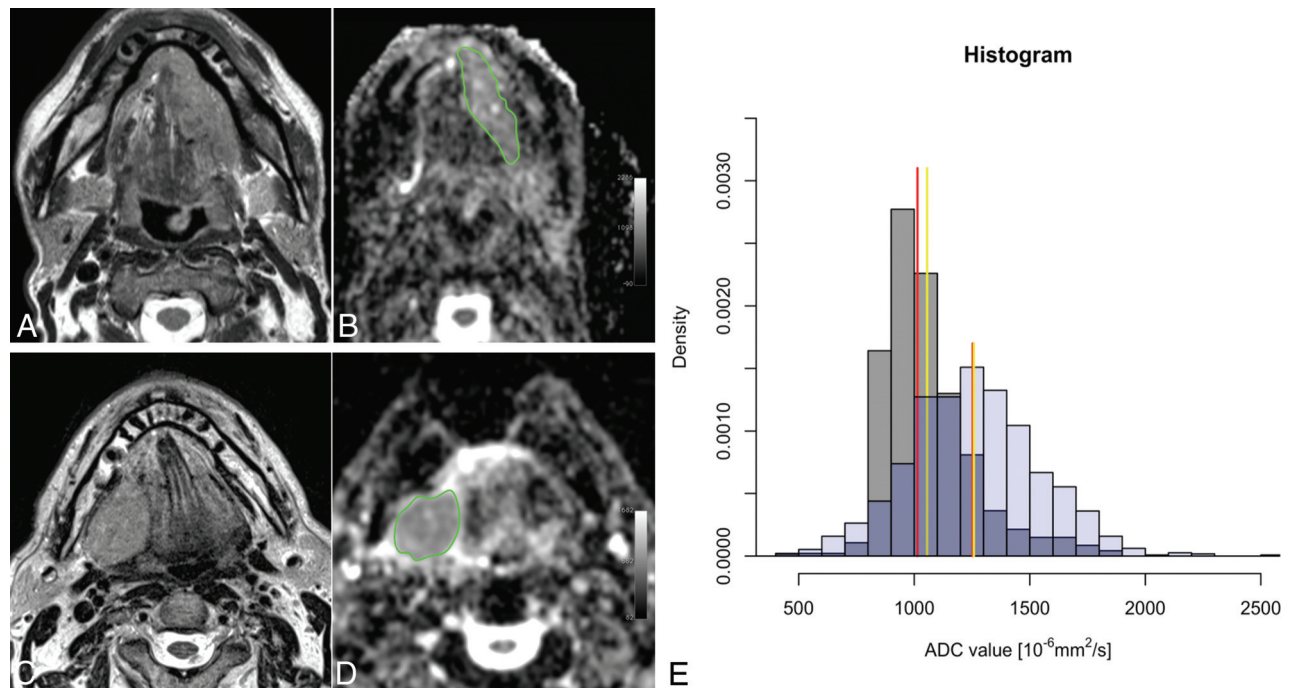

**ON-LINE FIGURE.** Characteristic ADC histograms obtained in 2 different patients with HNSCC of the oral cavity. Patient A (T2N1M0, images A, B, and E) has an HPV – HNSCC originating in the left floor of the mouth. Patient B (T2N1M0, images C, D, and E) has an HPV+ HNSCC originating from the right lateral tongue border. T2-weighted images (A and C), ADC maps (B and D), and corresponding histograms (E, *gray histogram* for HPV+ HNSCC and *blue histogram* for HPV – HNSCC). Median ADC values are represented by *red lines*. Mean ADC values are represented by *yellow lines*. Note the similar ADC histogram shapes as in HNSCC of the oropharynx (Fig 4): symmetric histogram (*blue*) with widely distributed ADC values around the central line in HPV – HNSCC as opposed to leptokurtic skewed right histogram (*gray*) in HPV+ HNSCC.
